# Supplementary material for: Evolution of a Major Drug Metabolizing Enzyme Defect in the Domestic Cat and Other Felidae: Phylogenetic Timing and the Role of Hypercarnivory
Source: PLOS journal article supplement (doi:10.1371/journal.pone.0018046), 2011-03-28
Supplement: S6 (10.1371/journal.pone.0018046.s006) [file journal.pone.0018046.s006]

**Table S3.** Protein content of commercial zoo animal diets formulated for various Carnivora in relation to the dietary classification proposed in this study.

| Species                                  | Crude Protein Content (% w/w) <sup>1</sup> | Dietary classification |
|------------------------------------------|--------------------------------------------|------------------------|
| Ferret                                   | 38                                         | Hypercarnivore         |
| Small felines                            | 36                                         | Hypercarnivore         |
| Large felines                            | 35                                         | Hypercarnivore         |
| Polar bear                               | 30.5                                       | Mesocarnivore          |
| Canine                                   | 28.5                                       | Mesocarnivore          |
| "Omnivores" including bears and raccoons | 25                                         | Hypocarnivore          |
| Herbivores                               | 14                                         | Non-carnivora          |

<sup>1</sup> Data from Mazuri (PMI Nutrition International, St Louis, Mo, USA); <https://www.mazuri.com/indexMazuri.asp> (last accessed 12/28/2010) .
